# Supplementary material for: The biological transformation of ammonium and urea in a eutrophic estuarine system in Southern China
Source: Frontiers journal article supplement (doi:10.3389/fmars.2022.1040554), 2022-12-12
Supplement: Data_Sheet_1.XLSX [file Data_Sheet_1.XLSX]

## Sheet: Sheet1
CRUISE	Station	Salinity	Layer	Lat	Lon	Bottom depth	Temp ◦C	Turb.	pH	Chla µg/L	Nitrate µM	Nitrite µM	Ammonium µM	Urea-N µM	PN µM	TSS mg/L	Ammonia oxidation nM/h	STD	Urea oxidation nM/h	STD	Ammonium uptake nM/h	STD	Urea uptake nM/h	STD
201812	T-1	0.5	surface	24.4714	117.79	7	NaN	NaN	7.56	4.07	214.759	13.2965	35.1764	3.72999	14.2097	92.9104	84.1	8.95	0.578216	0.0113767	46.0529	1.60071	0.464233	0.0110687
201812	T-2	1.4	surface	24.4319	117.841	8.4	21.977	86.3	7.58	1.97	166.627	13.2746	27.9092	3.06093	6.50317	64.5843	41.09	0.82	0.245885	0.0160516	22.7549	5.0343	0.379678	0.0121235
201812	T-3	1.1252	surface	24.4261	117.854	9.6	22.017	25	7.2393	1.6	164.418	14.8019	25.8402	3.37157	7.66627	53.0622	30.09	1.67	0.349988	0.28719	19.3715	1.74111	0.233849	0.273682
201812	T-4	3.7	surface	24.4192	117.867	6.7	21.994	94.2	7.6	1.76	155.314	13.9228	26.673	3.37157	10.8581	77.5067	17.34	0.24	0.0576586	0.0183236	18.5956	0.0847788	0.616264	0.0236164
201812	T-5	7.3	surface	24.406	117.892	5.5	22.102	25	7.56	0.89	141.258	13.8679	26.9175	2.82198	6.84908	56.3956	15.78	1.71	0.114518	0.0290207	20.661	3.55685	0.35751	0.0290965
201812	T-6	9.9	surface	24.4019	117.904	5.9	22.292	25	7.6	0.81	132.574	13.802	23.4985	2.91756	6.8512	65.5067	17.93	0.66	0.28684	0.0487015	18.3657	6.82967	0.373505	0.215837
201812	T-7	11.8	surface	24.3973	117.929	6	22.149	25.1	7.66	1.3	122.634	13.1427	17.1709	2.12903	4.69434	54.6178	11.37	0.5	0.132436	0.0287003	12.3933	1.20857	0.337504	0.00896325
201812	T-8	13.7	surface	24.4001	117.948	4.2	22.102	93.6	7.64	0.82	112.003	14.1206	14.3247	2.53524	7.38644	98.63	16.62	0.33	0.146149	0.0292653	14.493	4.31321	0.249002	0.010296
201812	T-9	15.8	surface	24.4017	117.968	9	22.073	25.1	7.71	0.98	99.1123	12.857	12.8283	2.34409	4.24368	41.9633	11.07	0.14	0.0980913	0.00139457	11.0398	1.03234	0.369486	0.012721
201812	T-10	19	surface	24.4106	117.991	6.7	21.912	25.1	7.74	0.48	84.4486	11.1539	7.45543	2.46356	3.7323	47.4633	10.1	1.06	0.0799431	0.00392394	5.74141	0.110083	0.392285	0.026287
201812	T-11	20.8	surface	24.4208	118.019	10.3	21.886	25.1	7.75	0.75	75.3662	10.0331	3.56438	1.91398	2.58796	23.7967	6.1	0.09	0.0211752	0.027173	5.45808	1.28779	1.23816	0.0240874
201812	T-12	25.2	surface	24.4416	118.051	12.8	21.843	20.7	7.8	0.39	51.2018	7.13232	5.99247	2.10514	2.06463	32.8644	14.24	1.97	0.67532		9.28221	1.94228	1.2605	0.189379
201812	T-13	24.1	surface	24.4281	118.073	16.1	21.609	20.8	7.81	0.74	58.2254	7.9674	4.6812	0.910394	2.25756	25.6422	12.31	0.3	0.0715367	0.0338037	11.2097	0.570452	1.45369	0.0867148
201812	T-14	27	surface	24.3819	118.114	10.4	21.473	22.7	7.83	0.62	43.0664	6.23131	2.67954	0.79092	2.02858	28.0867	13.6	0.32	0.104045	0.0347425	8.40698	0.494558	2.43603	0.0810915
201812	T-1	0	bottom	24.4714	117.79	7	NaN	NaN	7.43	3.51	193.204	10.4067	19.693	2.84588	10.6077	110.088	272.525	4.21934	2.19951	0.0781215	25.4625	2.41003	0.222447	0.040111
201812	T-2	6.7	bottom	24.4319	117.841	8.4	21.843	254.1	7.59	0.6	142.305	14.3733	19.1091	2.94146	9.07598	241.927	76.6255	3.07037	1.05949	0.00728212	8.26177	0.351305	0.0932806	0.0109991
201812	T-3	7.8782	bottom	24.4261	117.854	9.6	21.839	168.8	7.2776	0.82	113.551	11.4616	21.039	2.96535	13.2777	143.927	29.4442	15.6257	0.386368	0.0469212	15.5954	4.42886	0.0707545	0.00229098
201812	T-4	8	bottom	24.4192	117.867	6.7	21.852	167.4	7.64	0.99	141.203	13.9888	20.6652	2.94146	14.9542	137.26	40.947	1.401	0.543683	0.0218319	15.6404	0.129062	0.160997	0.0236346
201812	T-5	10.3	bottom	24.406	117.892	5.5	21.784	136.1	7.62	0.92	129.932	13.7031	21.4798	2.77419	7.57595	114.26	39.4544		0.527619	0.0506855	15.4731	1.71196	0.119065	0.0164119
201812	T-6	12.1	bottom	24.4019	117.904	5.9	21.754	81.2	7.64	0.67	121.093	13.0328	16.5288	2.7264	9.25245	99.9267	16.2743	0.509287	0.348809	0.0257435	19.3141	4.13551	0.133772	0.0138019
201812	T-7	12.4	bottom	24.3973	117.929	6	22.047	78.9	7.62	0.84	119.386	12.7252	15.6085	2.60693	7.10252	77.9511	15.3104	0.762919	0.181723	0.054882	14.5432	5.37562	0.236324	0.000953599
201812	T-8	15	bottom	24.4001	117.948	4.2	21.9	141.3	7.63	0.96	104.705	13.6152	14.6814	2.39188	9.14024	124.618	23.8784	0.391109	0.464416	0.016549	13.0997	2.97071	0.337937	0.215187
201812	T-9	19.3	bottom	24.4017	117.968	9	21.789	51.6	7.75	0.39	83.4359	11.1209	10.0472	1.96177	4.89475	69.9511	17.1715	0.810328	0.164395	0.0160928	9.85369	1.01183	0.280377	0.0508564
201812	T-10	19.9	bottom	24.4106	117.991	6.7	21.665	56.8	7.7	0.54	73.253	10.0551	5.79089	1.65114	3.65357	61.9633	9.51796	0.125393	0.0672317	0.00137826	4.5258	0.186461	0.254728	0.0363478
201812	T-11	26.1	bottom	24.4208	118.019	10.3	21.272	46.1	7.78	0.3	47.0187	6.81367	3	0.910394	3.49248	67.4633	21.6466	0.0295158	0.117777	0.0051483	4.65204	0.32159	0.161314	0.0033185
201812	T-12	27.7	bottom	24.4416	118.051	12.8	21.351	34.2	7.83	0.29	39.8406	5.74784	2.95615	1.07766	2.80004	52.4633	12.5016	0.636176	0.105984	0.0061586	5.3317	0.470709	0.3852	0.0287466
201812	T-13	28.6	bottom	24.4281	118.073	16.1	21.146	76.1	7.86	0.2	32.5414	4.68202	0.942628	0.241338	4.99127	87.63	16.5725	0.314625	0.17511	0.00947687	6.95009	2.05191	0.214839	0.0102864
201812	T-14	29.1	bottom	24.3819	118.114	10.4	21.149	54.1	7.9	0.4	29.6679	4.23151	1.03705	0.528076	3.92823	56.1978	19.3886	0.192845	0.204953	0.0207624	3.69892	0.270351	0.706113	0.0158774
